# Supplementary material for: Pivotal role of NAMPT in the switch of melanoma cells toward an invasive and drug-resistant phenotype
Source: PubMed Central journal article supplement — Genes Dev. 2018 Mar 1;32(5-6):448–61. doi: 10.1101/gad.305854.117 (PMC5900716; doi:10.1101/gad.305854.117), 2018-03-01
Supplement: supp_gad.305854.117_Supplemental_Material_.pdf [file supp_gad.305854.117_Supplemental_Material_.pdf]

## Supplemental figure legends

**Supplemental Figure 1: BRAF/ERK signaling pathway controls metabolism, NAD<sup>+</sup> level, and proliferation in BRAF<sup>V600E</sup> melanoma cells.** (A-F) Deregulated dipeptides, long chain fatty acids and mono acyl glycerols in PLX4032-treated versus non-treated cells. Note that these metabolites are poorly annotated in the KEGG or HMDB databases. (G) Schematic summary of the effects of PLX4032 on melanoma metabolism. Metabolites highlighted in yellow are downregulated, while those highlighted in red are upregulated. \*Note that glucose 6-P and pyruvate are downregulated by PLX4032 with a Log Fc of -1.9 and -2.4 respectively, and a FDR=0.058.

**Supplemental Figure 2: PLX4032 does not affect NAMPT expression in BRAF<sup>WT</sup> melanoma cells.** (A) Dose response curves of melanoma cells exposed to increasing concentration of PLX4032 for 72 h. Cell number is shown. Values represent the means +/-SD of three independent experiments. (B) Proliferation assays of BRAF<sup>WT</sup> and BRAF<sup>V600E</sup> human melanoma cells exposed to PLX4032 (5  $\mu$ M, 72 h). (C) Intracellular NAD<sup>+</sup> levels in A375 human melanoma cells, exposed to MEK (GSK1120212, U0126, and PD98059) or ERK (SCH772984) inhibitors. Values represent the means +SD of three independent experiments. (D) Intracellular NAD<sup>+</sup> levels in glucose-deprived human melanoma cells. Values represent the means +SD of three independent experiments.

**Supplemental Figure 3: The BRAF/ERK signaling pathway controls NAMPT expression.** (A) NAMPT mRNA and NAD<sup>+</sup> levels in BRAF<sup>V600E</sup> melanoma cells

(A375, WM9, and UACC62) exposed or not to PLX4032 (5  $\mu$ M, 24 and 48 h) were measured using QPCR. Values represent the means  $\pm$ SD of three independent experiments. (B) Western blot analysis of NAMPT, pERK and ERK2 in human HMVII melanoma cells exposed to PLX4032. (C) Western blot analysis of NAMPT expression in A375 melanoma cells exposed to BRAF (PLX4032), MEK (GSK1120212, U0126, and PD98059) or ERK (SCH772984) inhibitors. Phospho-ERK analysis shows the efficiency of kinase inhibitors, and ERK2 was used as loading control. (D) Analysis of publicly available data sets GSE51115 (n=26) of melanoma cells exposed to MEK inhibitor (MEKi). Scatter plots showing the means  $\pm$ SD of the NAMPT mRNA expression. (E) Western blot analysis of NAMPT expression in normal human melanocytes (MHN) after transduction with empty (EV) or *BRAF*<sup>V600E</sup> adenovirus. Where indicated, the cells were exposed to MEK (GSK1120212 and U0126) or ERK (SCH772984) inhibitors. Western blot analysis shows the transduction efficiency based on BRAF expression. Phospho-ERK analysis shows the efficiency of kinase inhibitors, and HSP90 was used as loading control. (F) Intracellular NAD<sup>+</sup> levels in MHN after transduction with empty (EV) or *BRAF*<sup>V600E</sup> adenovirus. Values represent the means  $\pm$ SD of three independent experiments.

**Supplemental Figure 4: The BRAF/ERK signaling pathway, through STAT5 activation, controls NAMPT at the transcriptional level.** (A) Activity of NAMPT promoter in A375 cells exposed to increasing doses of PLX4032 for 48h. Data are shown as the means  $\pm$ SD of 3 experiments. (B) Activity of NAMPT promoter reporter vector in A375 cells exposed to MEK (GSK1120212 and U0126) or ERK (SCH772984) inhibitors. Values represent the means  $\pm$ SD of three independent

experiments. (C) Activity of NAMPT promoter fragments with different lengths in A375 cells exposed to PLX4032. Values represent the means +SD of three independent experiments. (D) Activity of NAMPT promoter reporter in 501mel cells transfected with a control vector or a vector encoding BRAF<sup>V600E</sup> and left untreated or exposed to STAT5 inhibitor (STAT5i, 100  $\mu$ M, 48 h). Values represent the means +SD of three independent experiments. (E) Intracellular NAD<sup>+</sup> levels of control or STAT5i treated A375 and WM9 melanoma cells. Values represent the means +SD of three independent experiments. (F) Western blot analysis of NAMPT, STAT5 and ERK in HMVII cells control or exposed to PLX4032 (5  $\mu$ M) or STAT5i (100  $\mu$ M) for 48 h. (G) Intracellular NAD<sup>+</sup> levels of control or STAT5i treated HMVII melanoma cells. Values represent the means +SD of three independent experiments.

**Supplemental Figure 5: NAMPT controls melanoma cell proliferation.** (A) Western blot analysis of NAMPT expression in A375 and UACC62 melanoma cells transfected with control or 2 different NAMPT siRNA or exposed to NAMPT inhibitor (FK866). HSP90 was used as loading control. (B) Intracellular NAD<sup>+</sup> levels in A375 and UACC62 melanoma cells treated as in (A). Values represent the means +SD of three independent experiments. (C) Dose response curves of melanoma cells exposed to increasing concentration of FK866 for 72 h. Intracellular NAD<sup>+</sup> is shown. Values represent the means +/-SD of three independent experiments. (D) Dose response curves of melanoma cells exposed to increasing concentration of FK866 for 48 h. Cell number is shown. Values represent the means +/-SD of three independent experiments. (E) Proliferation of A375 and UACC62 melanoma cells treated as in (A). Cells were trypsinized and counted each day. (F) Intracellular NAD<sup>+</sup> levels in A375

and UACC62 melanoma cells exposed to FK866 (5  $\mu$ M) or FK866 plus NAD<sup>+</sup> (500  $\mu$ M) for 48 h. Values represent the means +SD of three independent experiments.

**Supplemental Figure 6: NAMPT mediates melanoma cell survival.** (A) A375 or WM9 melanoma cells exposed to 2 different NAMPT siRNAs or to FK866 (10  $\mu$ M, 48 h), were then exposed to DAPI and % of dead cells up-taking DAPI measured by FACS. Histograms represent the means +SD of three independent experiments. (B) NAMPT mRNA level in tumors established by subcutaneous injection of WM9 cells. (C) NAD<sup>+</sup> level in the corresponding tumors.

**Supplemental Figure 7: NAMPT inhibition resensitizes PLX4032-resistant melanoma cells to PLX4032.** (A) PLX4032-resistant A375 melanoma cells were transfected with control or NAMPT siRNA and subsequently exposed to PLX4032 (5  $\mu$ M). After 48 h, the cells were counted. The histogram represents the means +SD of three independent experiments. (B) Cell number of PLX4032-resistant A375 melanoma cells exposed to FK866 (5  $\mu$ M) or FK866 plus NAD<sup>+</sup> (500  $\mu$ M) for 72 h. Values represent the means +SD of three independent experiments. (C) Growth curve of tumor xenografts of PLX4032-resistant A375 melanoma cells after subcutaneous injection. Mice (6 per group) were treated with vehicle, PLX4032 (25 mg/kg) or FK866 (1.5 mg/kg and 15 mg/kg) alone or with the low FK866 dose in combination with PLX4032. Black arrow indicates beginning of the treatment. Data are presented as the means +/-SD. (D) NAD<sup>+</sup> level in the corresponding tumors.

**Supplemental Figure 8: Regulation of NfκB and TGFβ signaling pathways by NAMPT.**(A) Activity of NFκB and (B) TGFβ promoter reporter in A375 or WM9 melanoma cells transduced with an empty (EV) adenovirus or an adenovirus encoding NAMPT (Ad NAMPT). Data are shown as the means +SD of three experiments.

**Supplemental Figure 9: NAMPT induces changes in H3K27me3, H3K27ac and H3K4me3 histone marks.** Profiles of H3K27me3, H3K27ac and H3K4me3 histone marks showing the regulation of each mark within the specified cluster.

**Supplemental Figure 10:** Venn diagrams displaying the intersection between genes and histone marks regulated by NAMPT. (A) Intersection of genes up-regulated by NAMPT with active histone marks down-regulated and repressive histone marks up-regulated by NAMPT. (B) Intersection of genes down-regulated by NAMPT with active histone marks up-regulated and repressive histone marks down-regulated by NAMPT.

**Supplemental Figure 11: NAMPT promotes histone modifications.** UCSC browser view of H3K27ac and H3K4me3 ChIP-Seq binding density at (A) CDK2/PMEL, (B) BIRC7, (C) ITGB4 and (D) WNT5A loci.

**Supplemental Figure 12:** NAMPT enhances the motile features of melanoma cells. (A-B) Boyden chamber experiments with 501mel or SKmel28 melanoma cells transduced with an empty (EV) adenovirus or an adenovirus encoding NAMPT. Values represent mean + SD of three independent experiments. (C-D) Western blot analysis of NAMPT, fibronectin (FN) and MITF in 501mel or in SKmel28. (E)

melanoma cells transduced with an empty (EV) adenovirus or an adenovirus encoding NAMPT. (E) UCSC browser view of H3K27ac and H3K4me3 ChIP-Seq binding density at the ZEB1 locus.

**Supplemental table 1.** Differential metabolite level in PLX4032-treated melanoma cells when compared to control cells.

**Supplemental table 2.** Analysis of enriched metabolic function in PLX4032-treated melanoma cells when compared to control cells using MetaboAnalyst.

**Supplemental table 3.** Top 10 differentially regulated cellular functions in melanoma cells with forced expression of NAMPT when compared to control melanoma cells analysed using Ingenuity Pathway analysis.

# Ohanna\_Supplemental Fig1

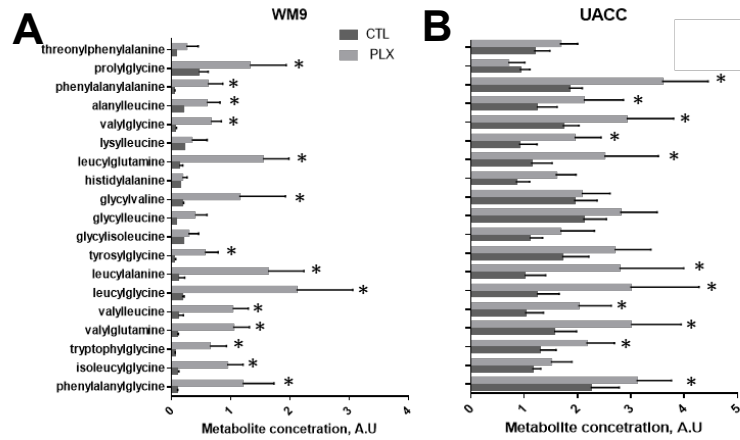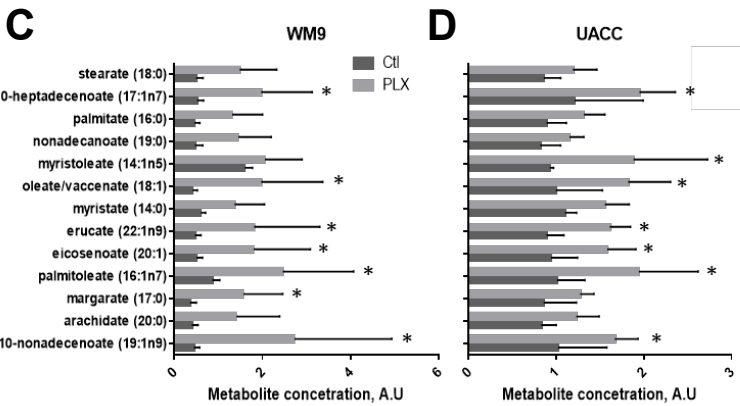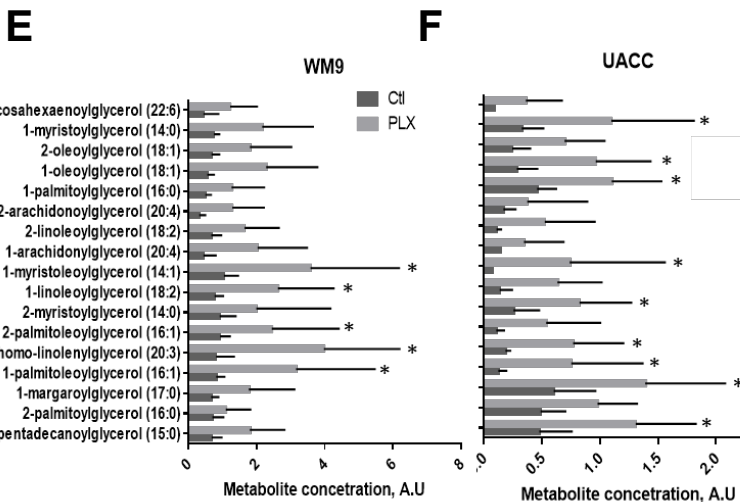

Dipeptides

Long Chain Fatty Acids

Mono acyl Glycerols

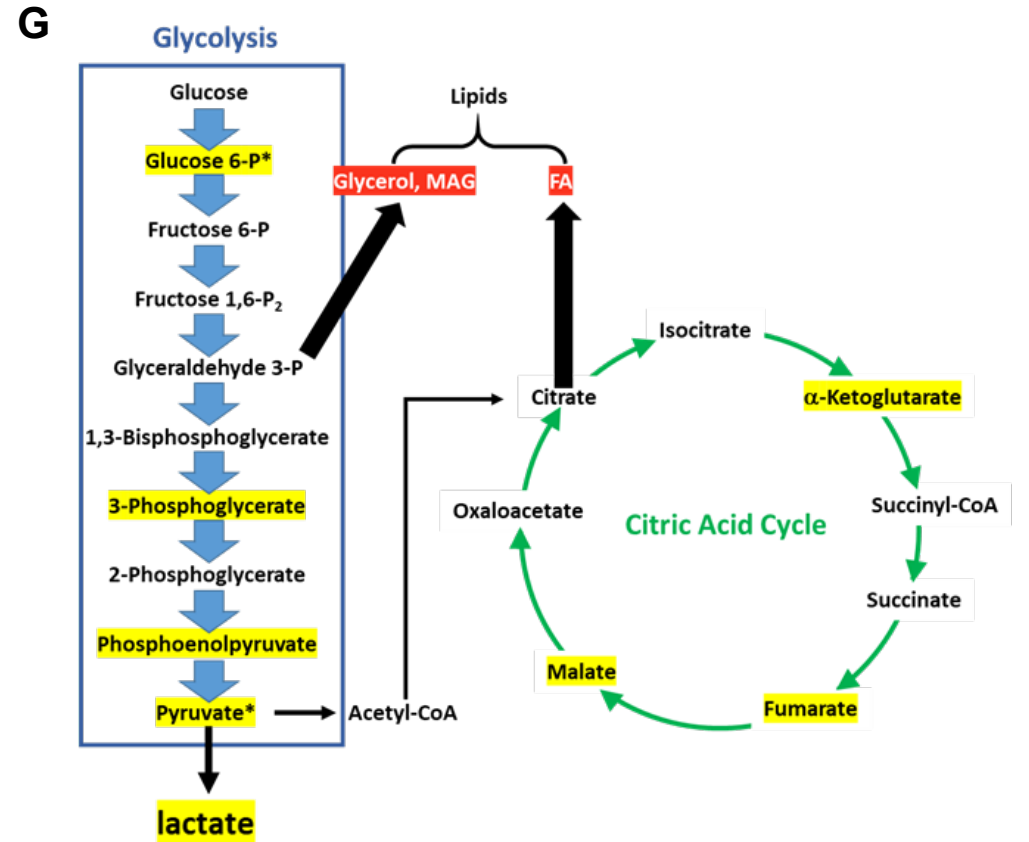

# Ohanna\_Supplemental Fig2

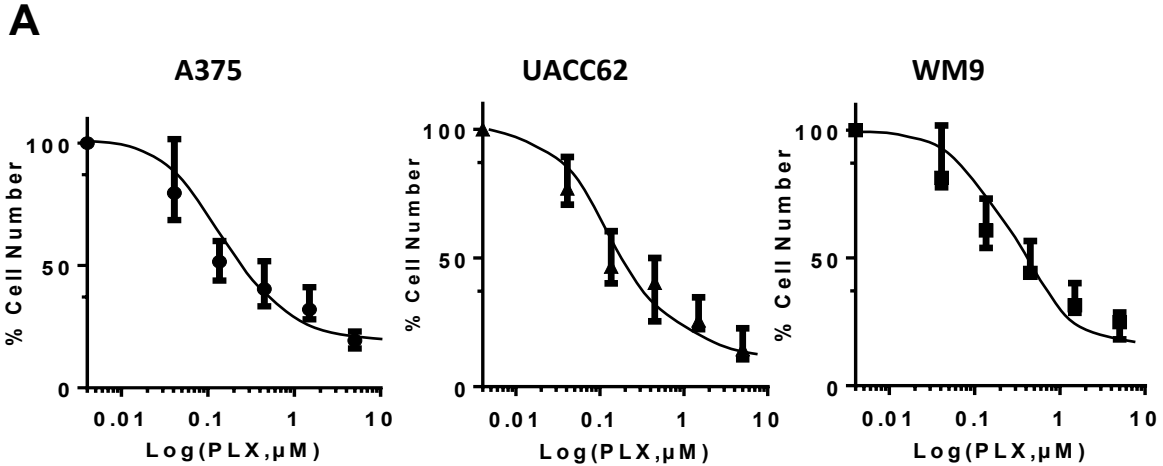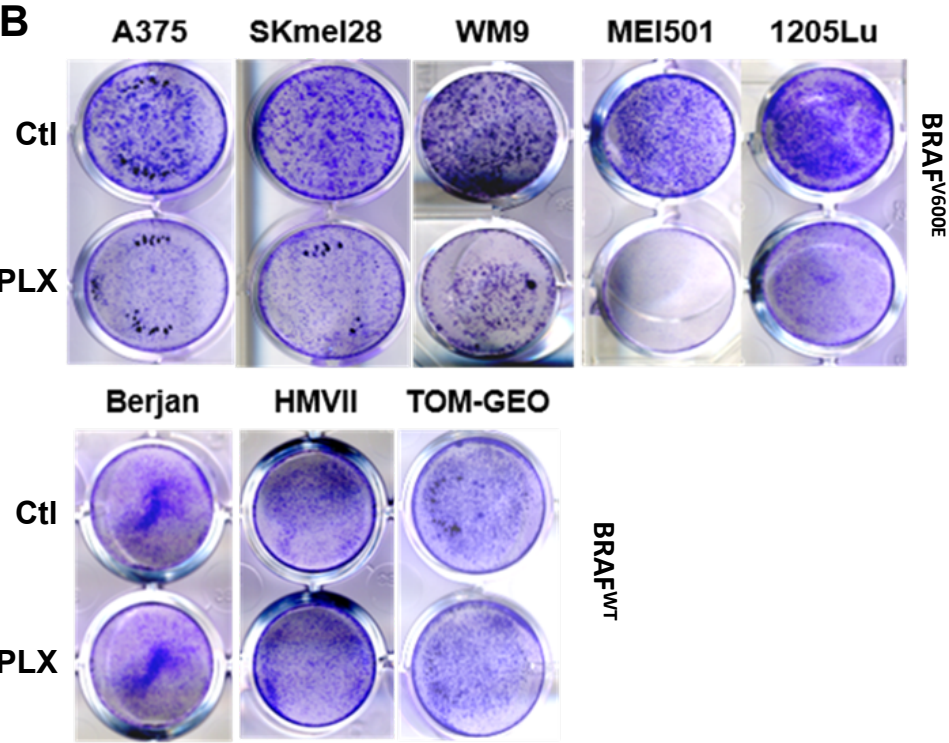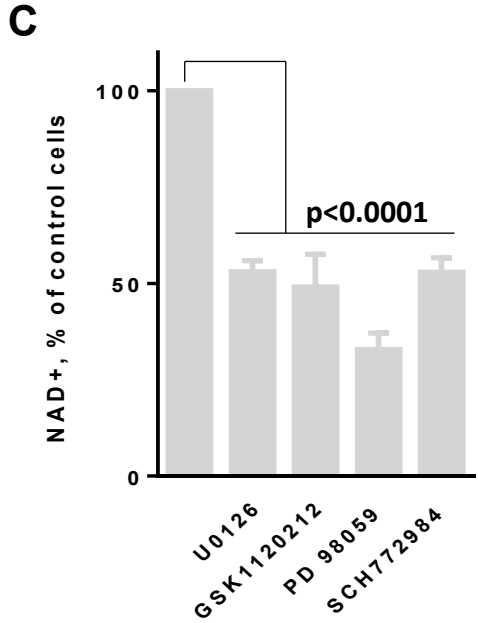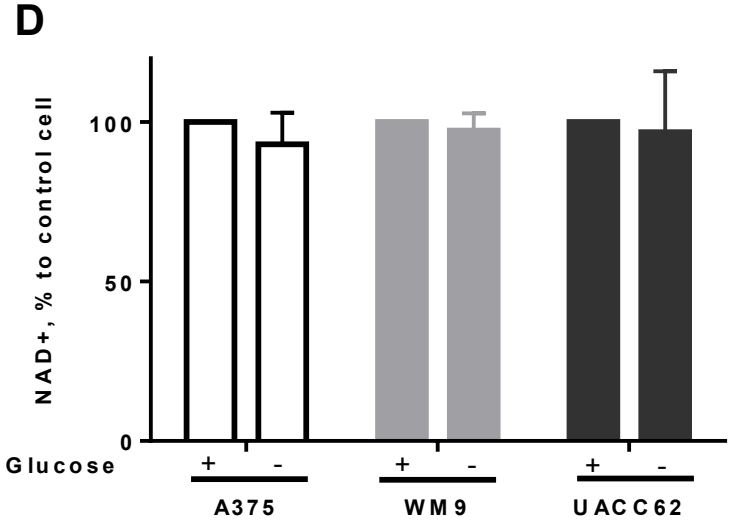



**A**

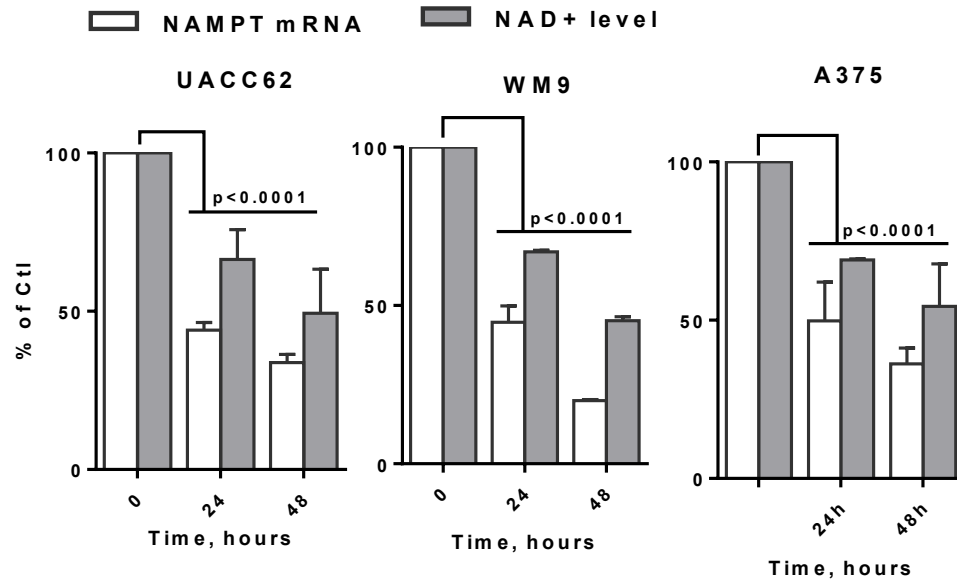

**B**

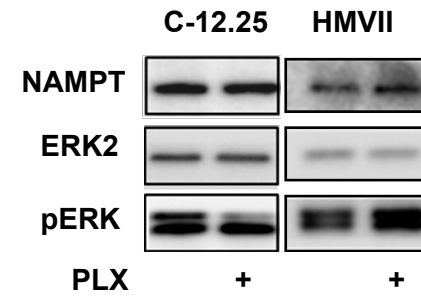

**C**

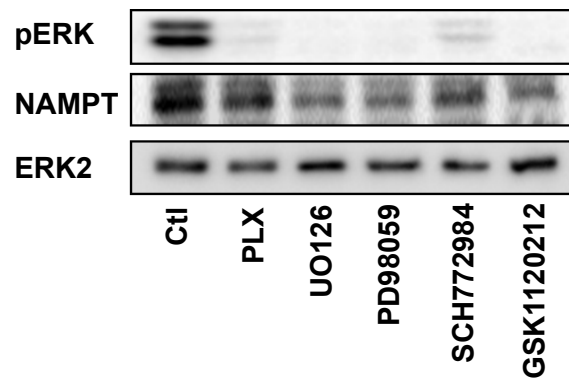

**D**

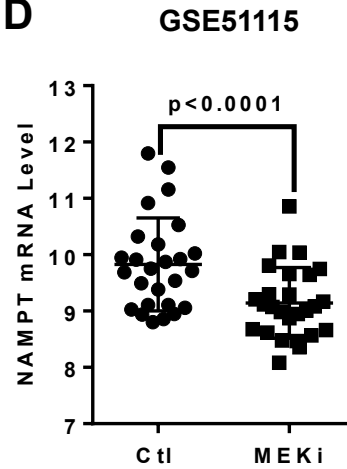

**E**

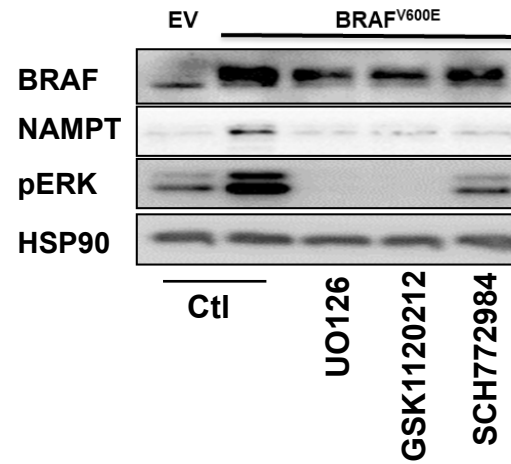

**F**

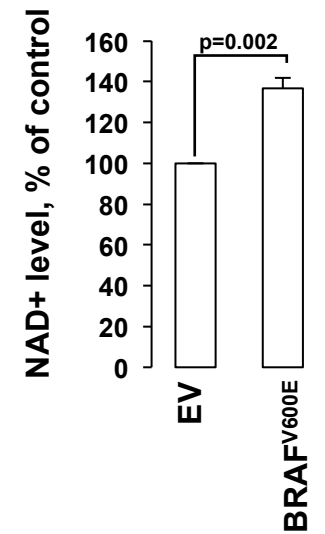

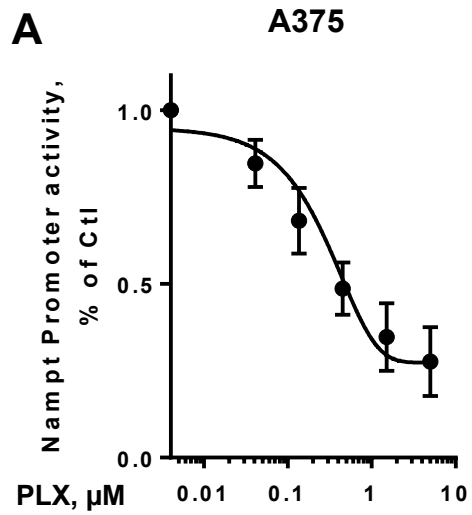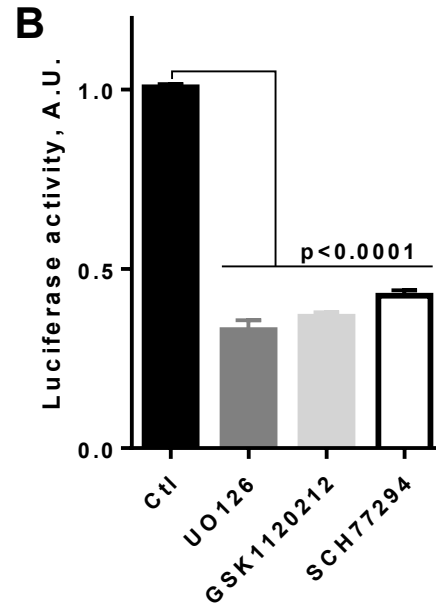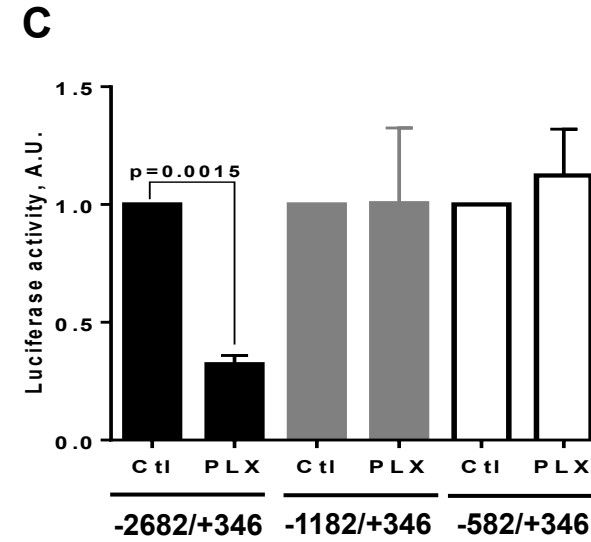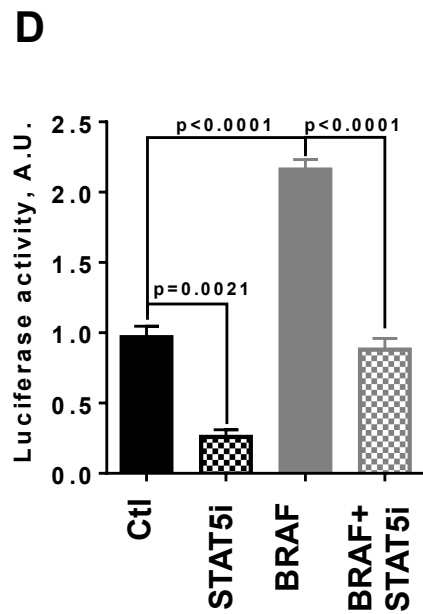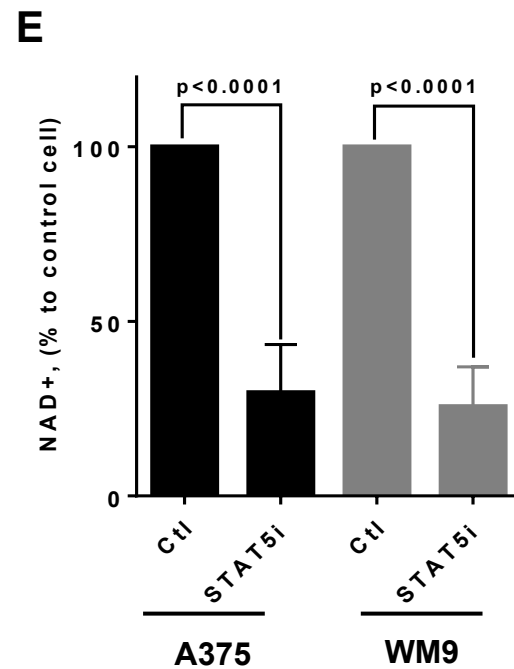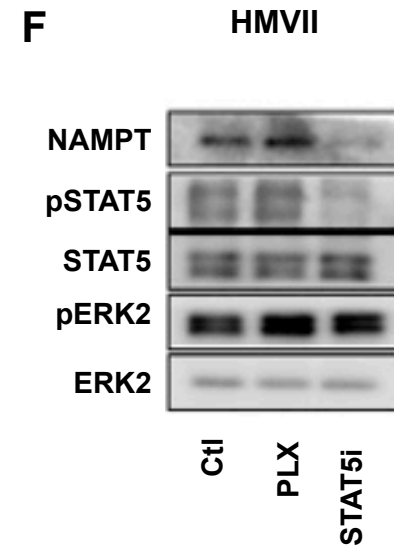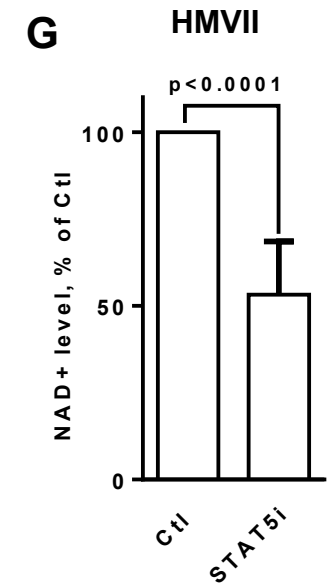

# Ohanna\_Supplemental Fig5

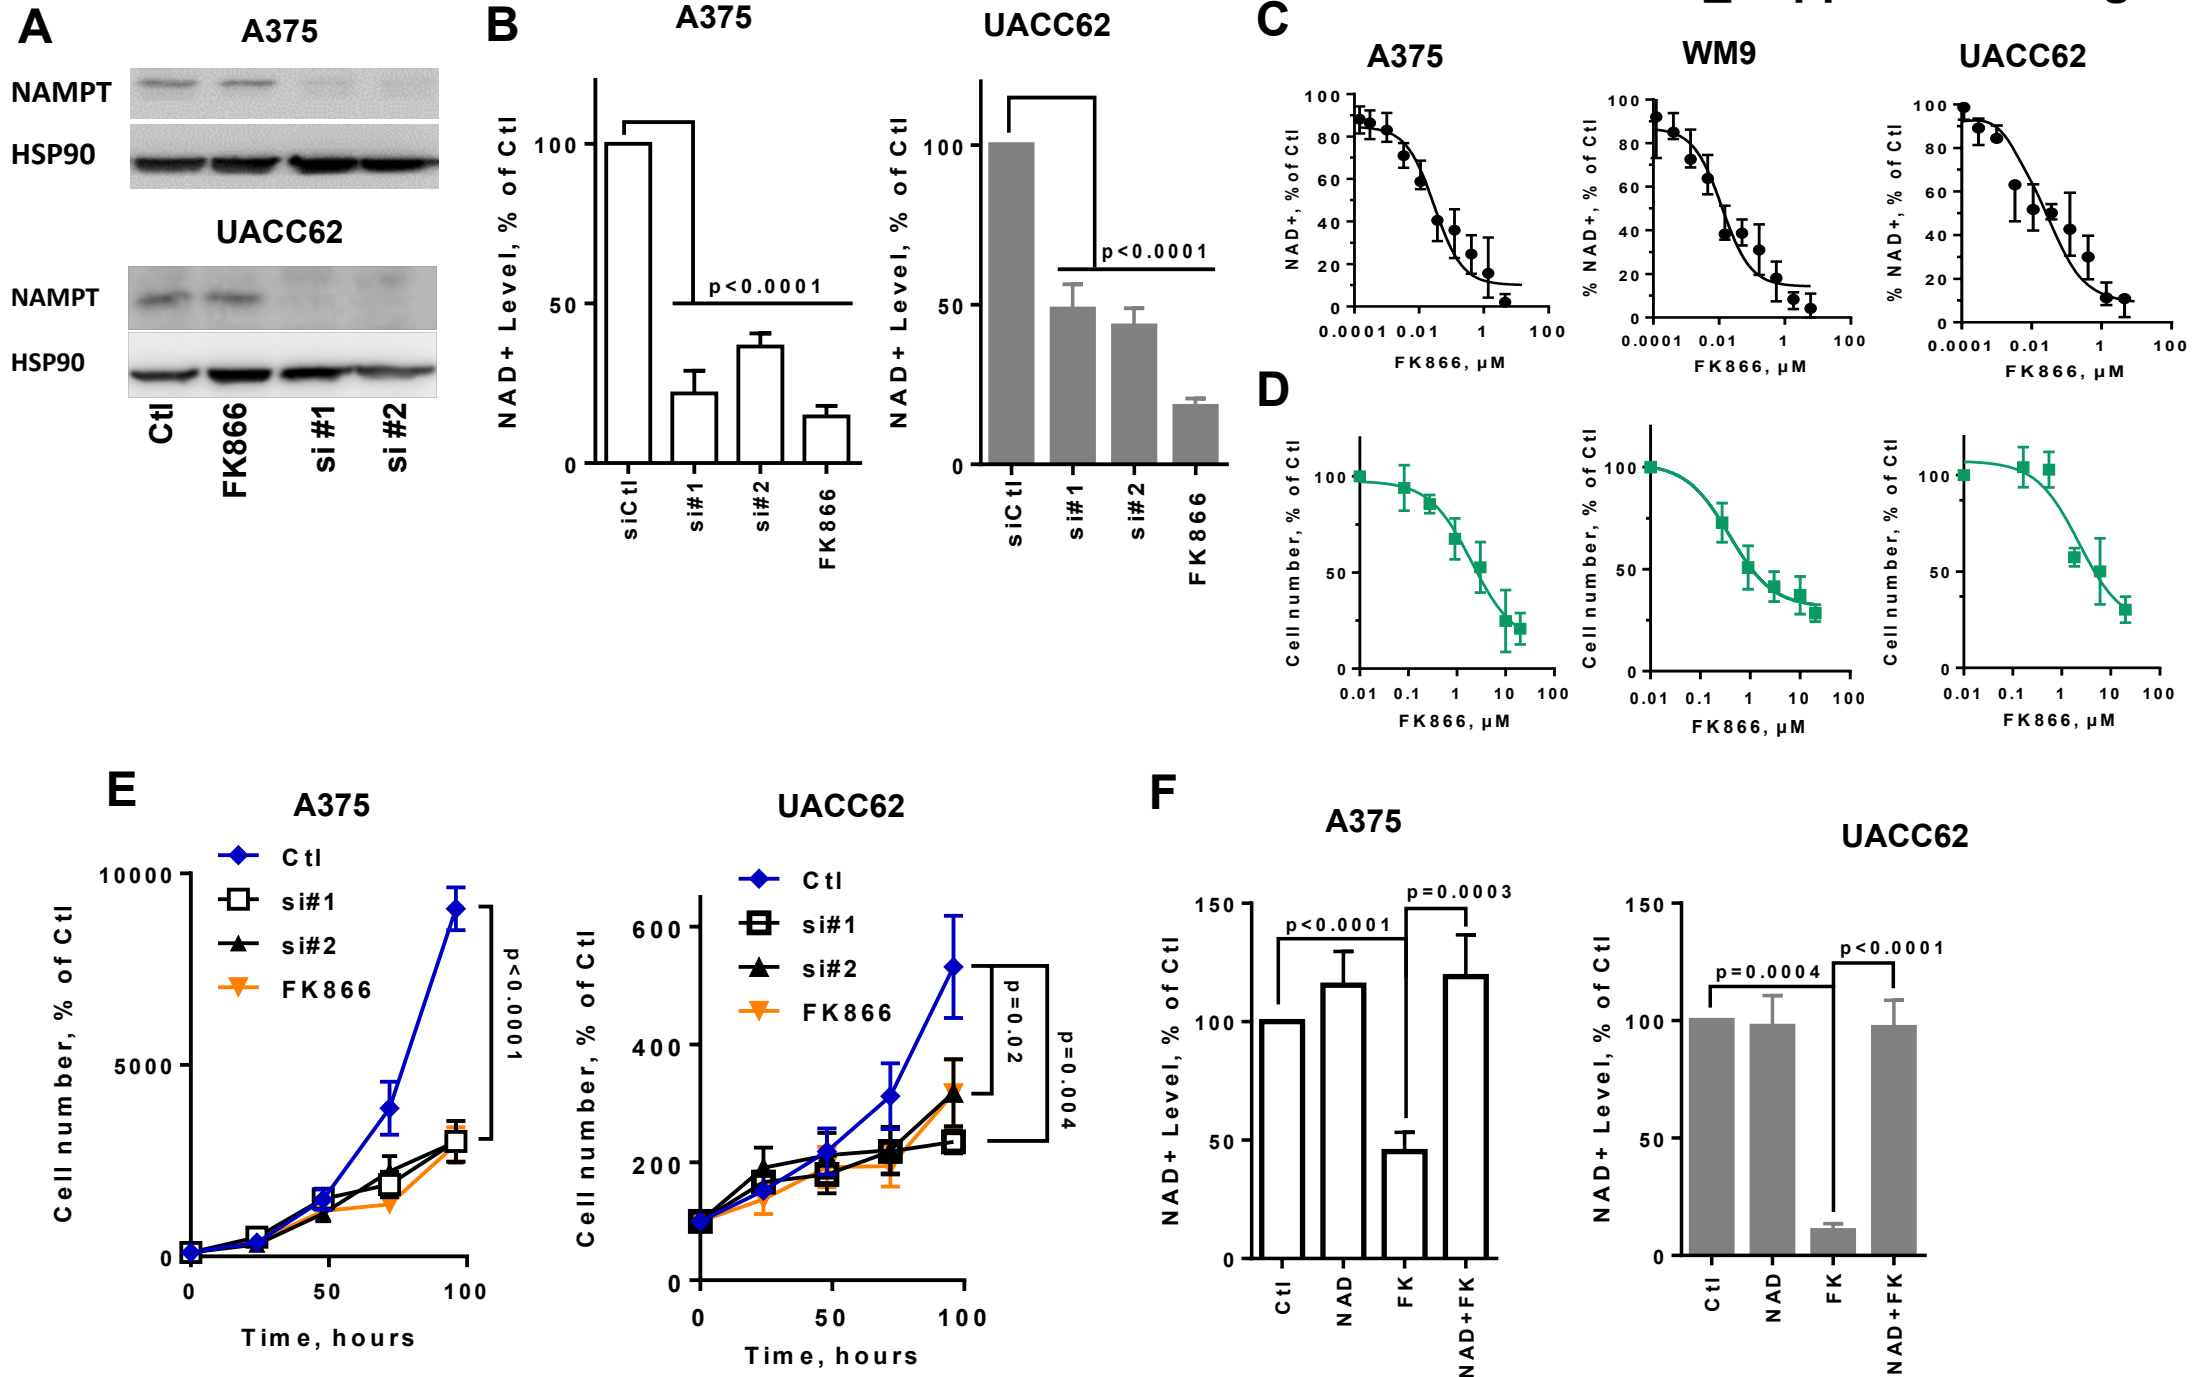

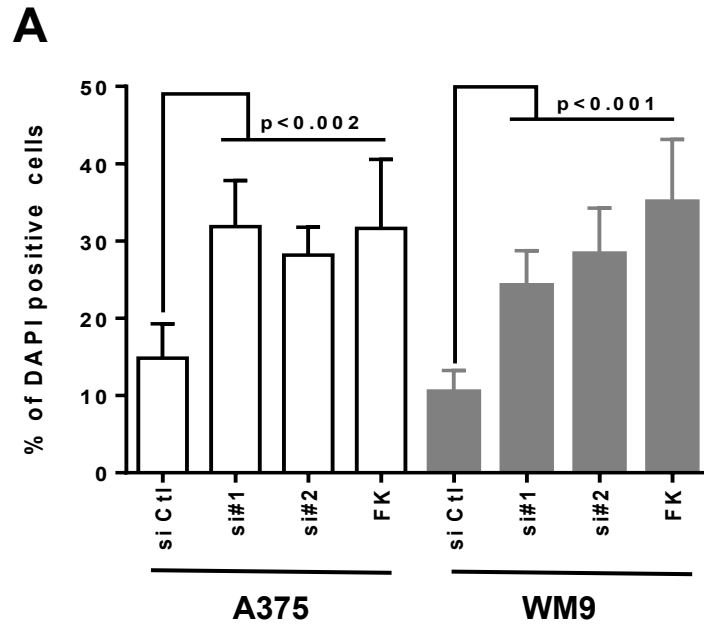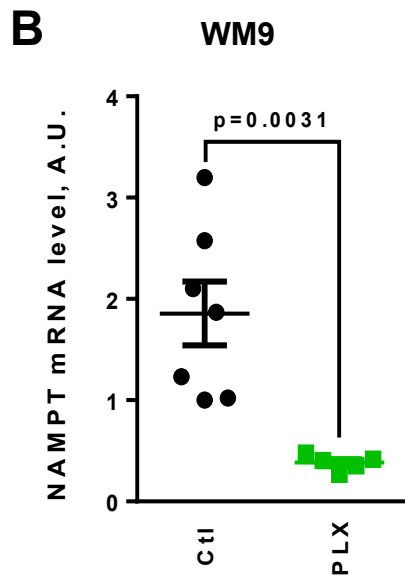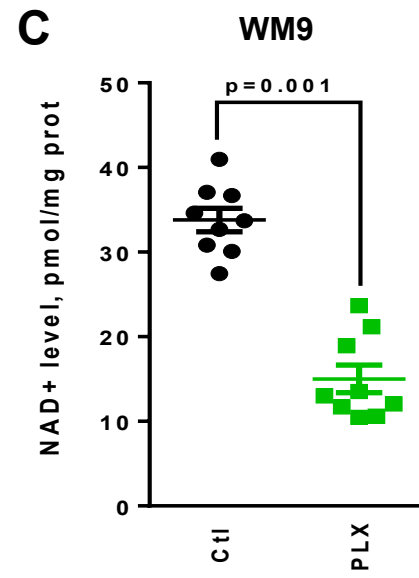

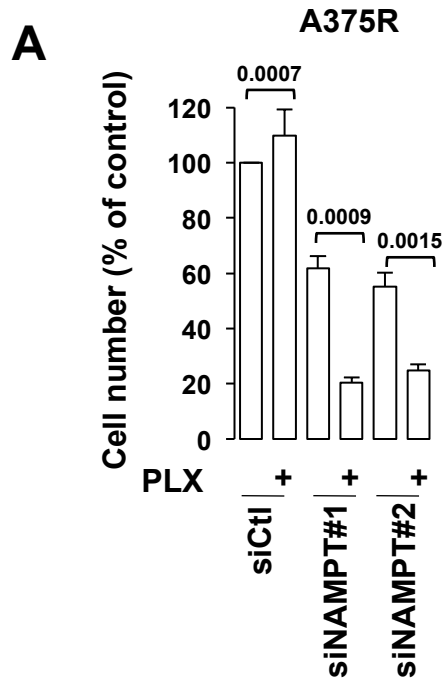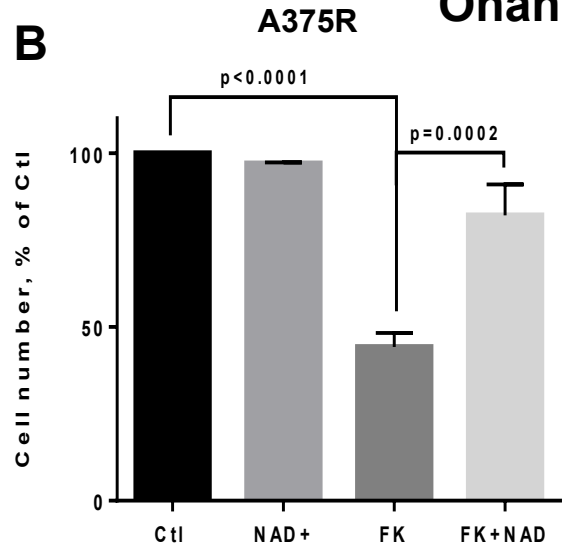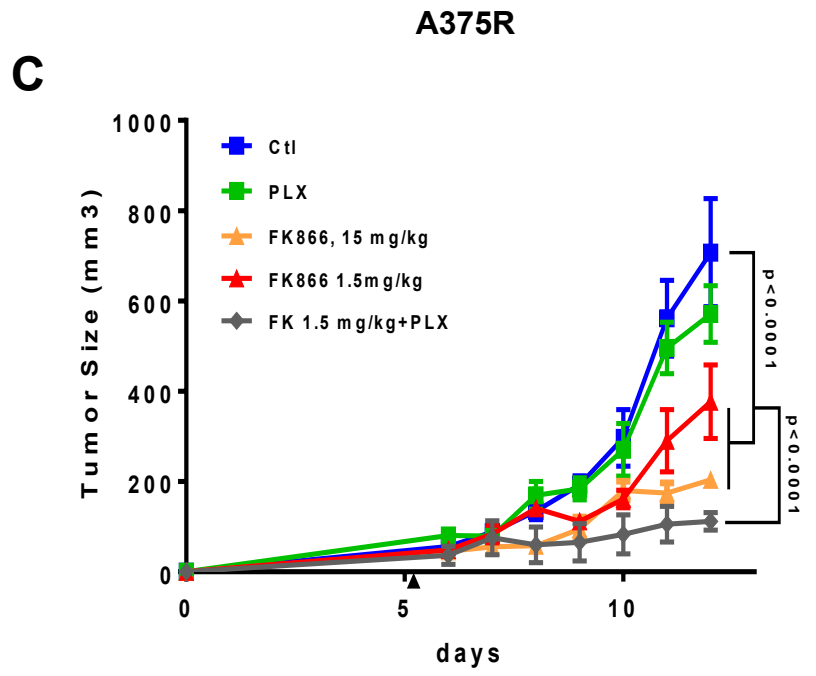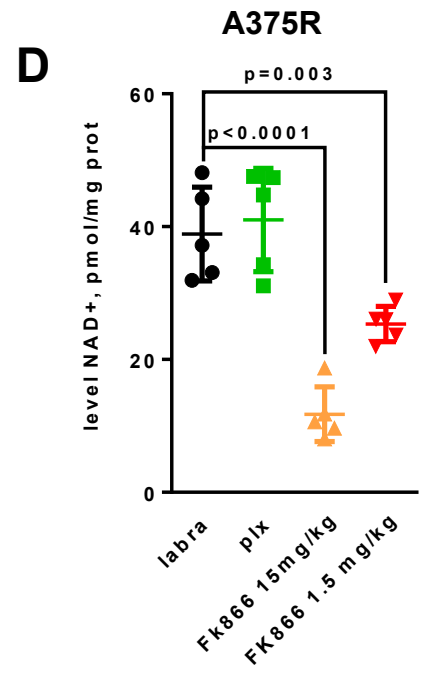

# Ohanna\_Supplemental Fig8

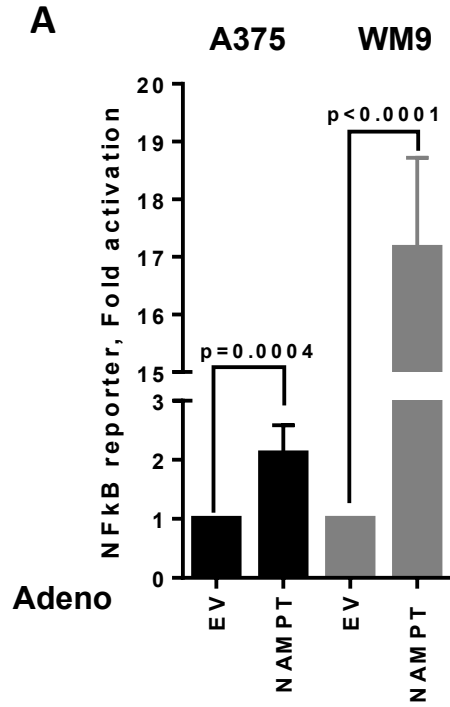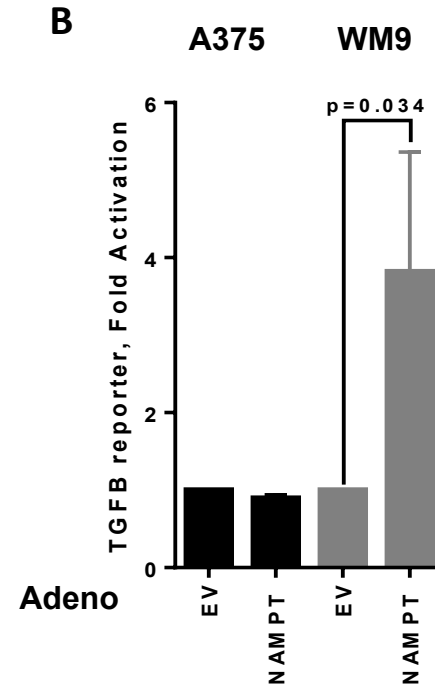

# Ohanna\_Supplemental Fig9

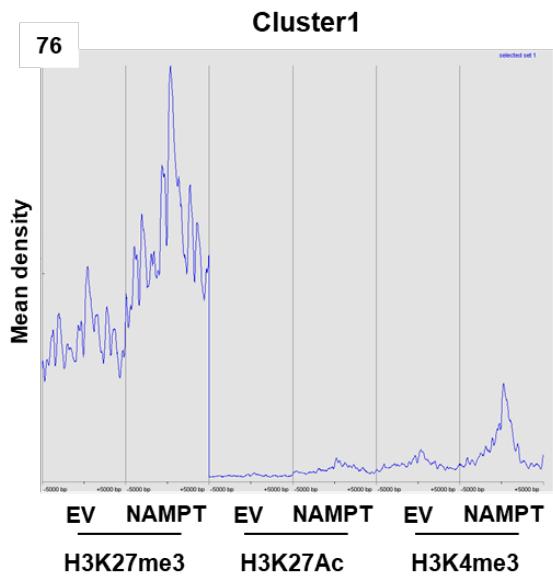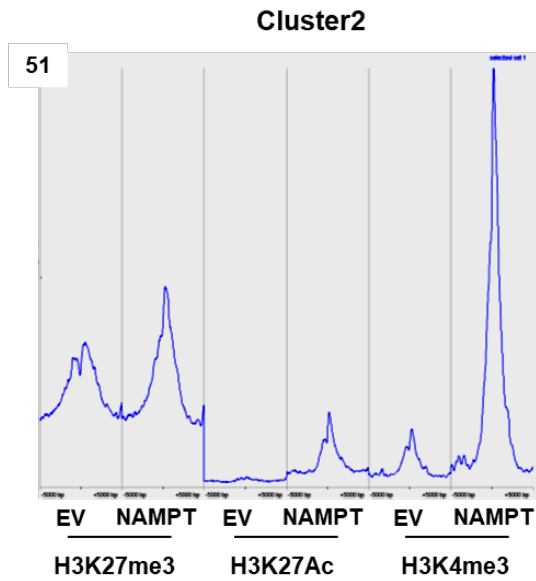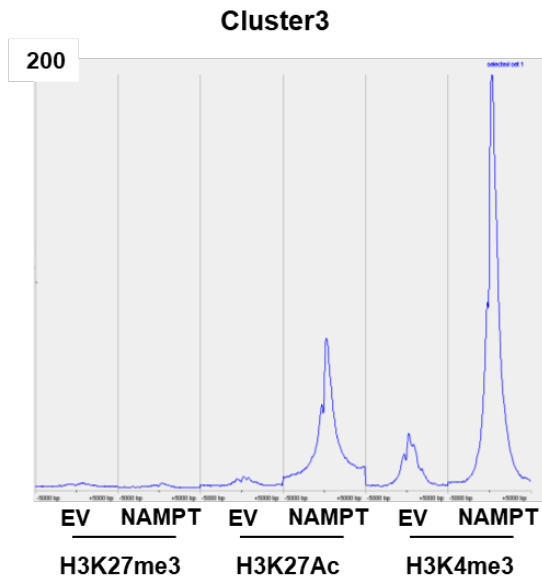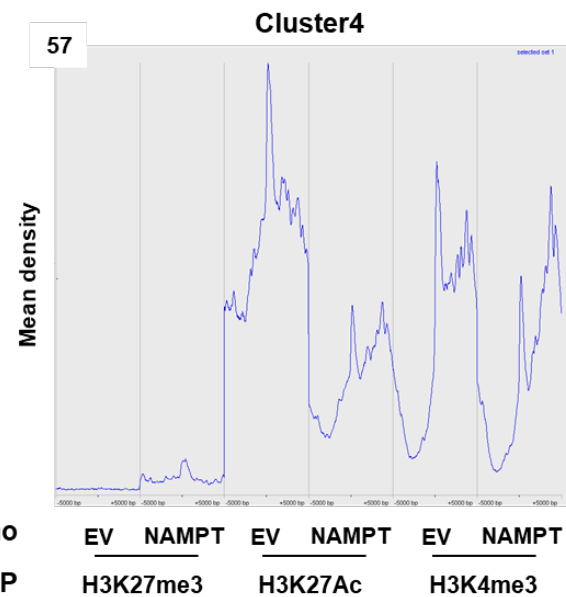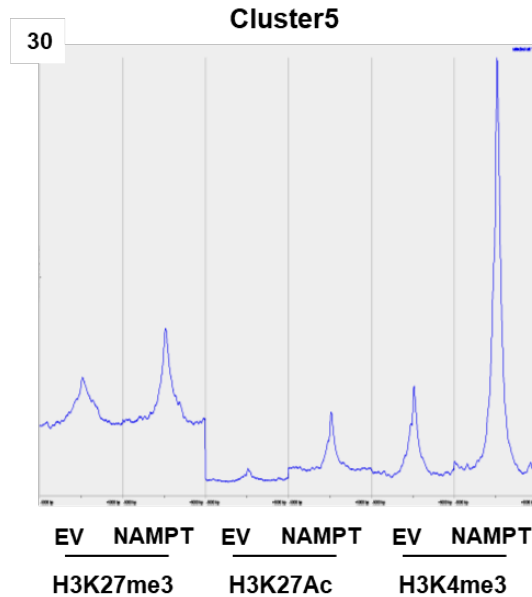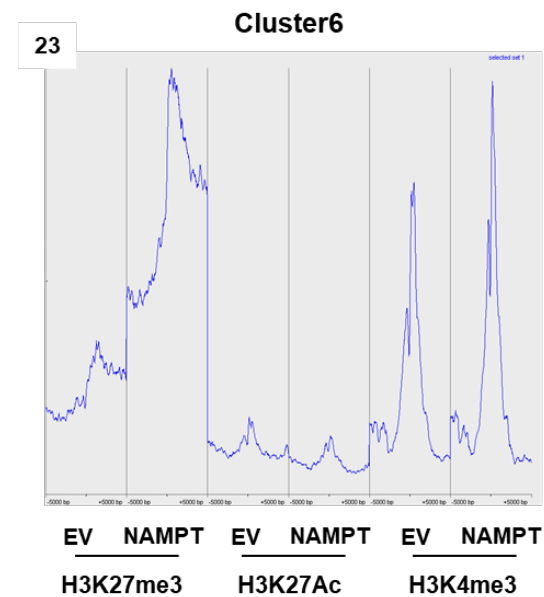

# Ohanna\_Supplemental Fig10

**A**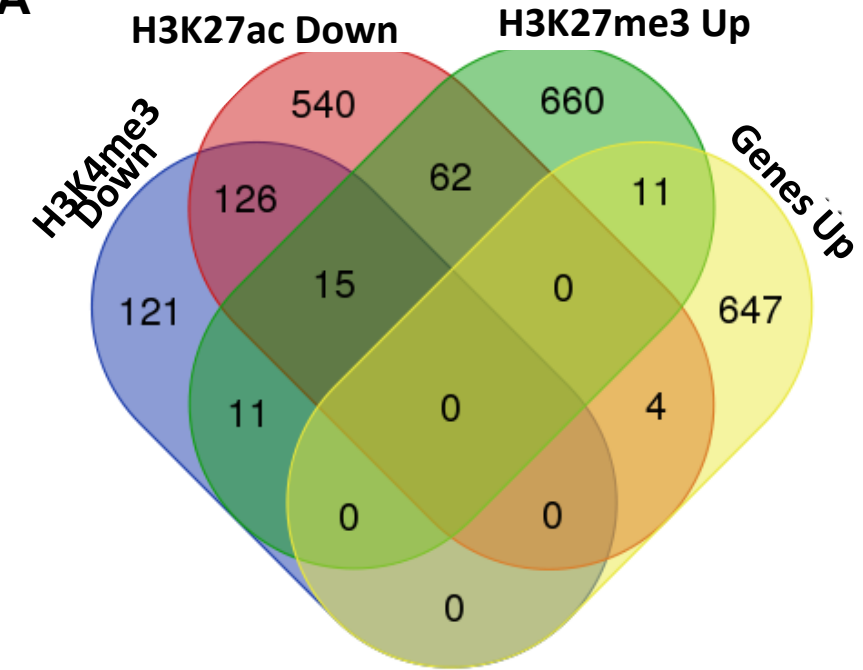**B**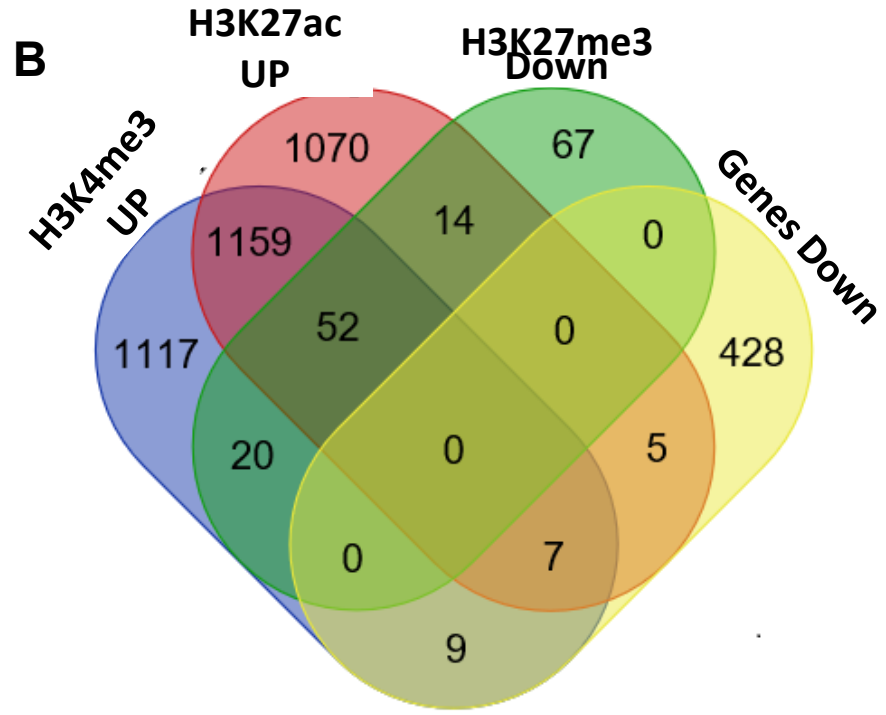



**A**

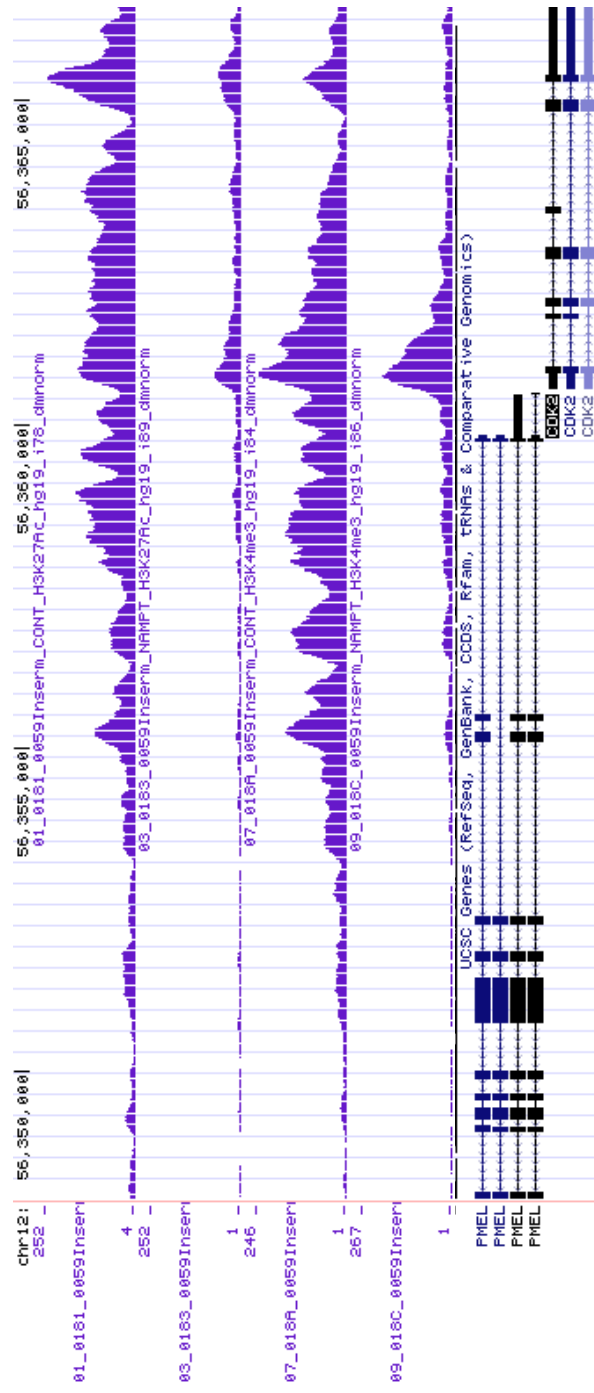

**B**

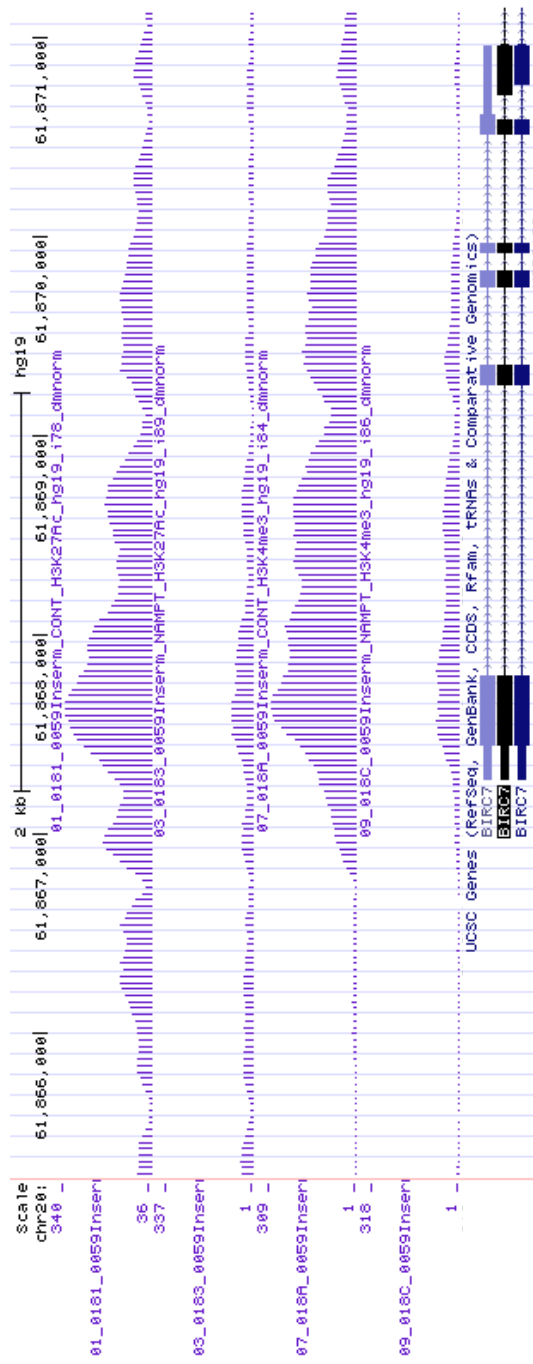

C

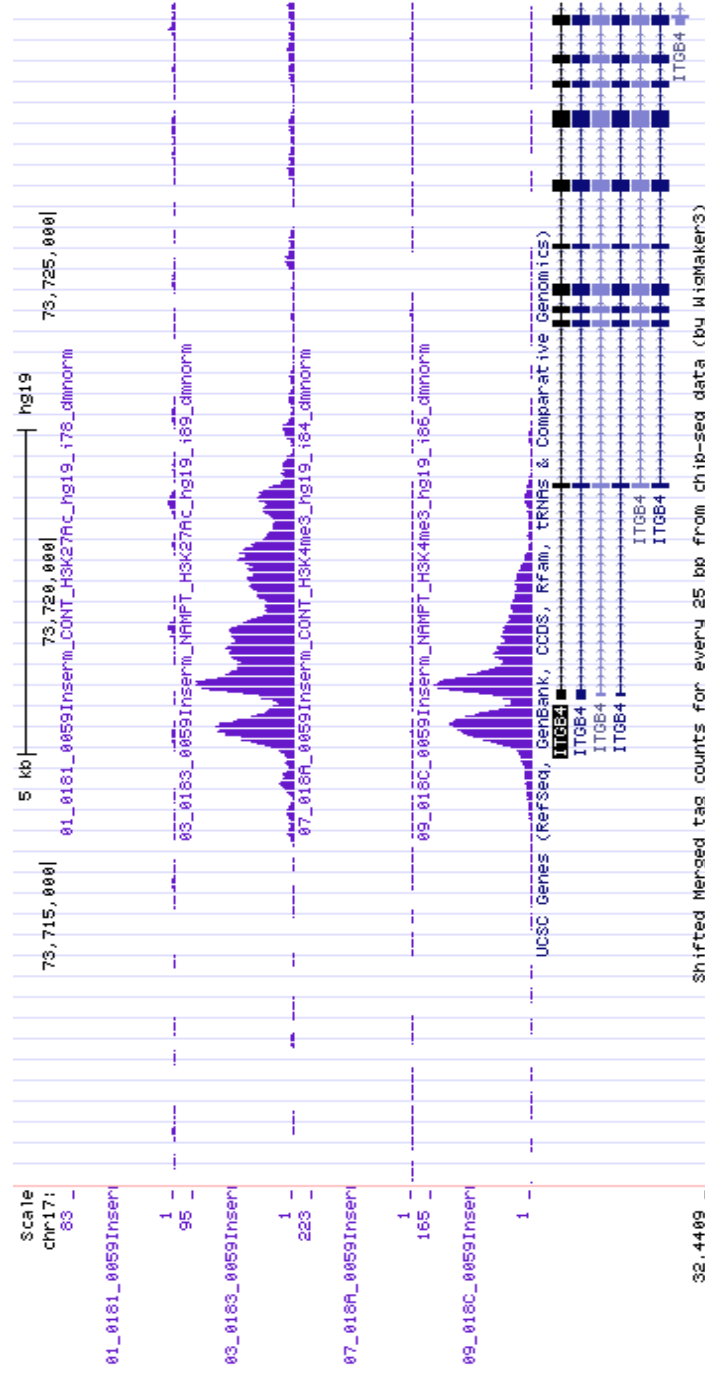

D

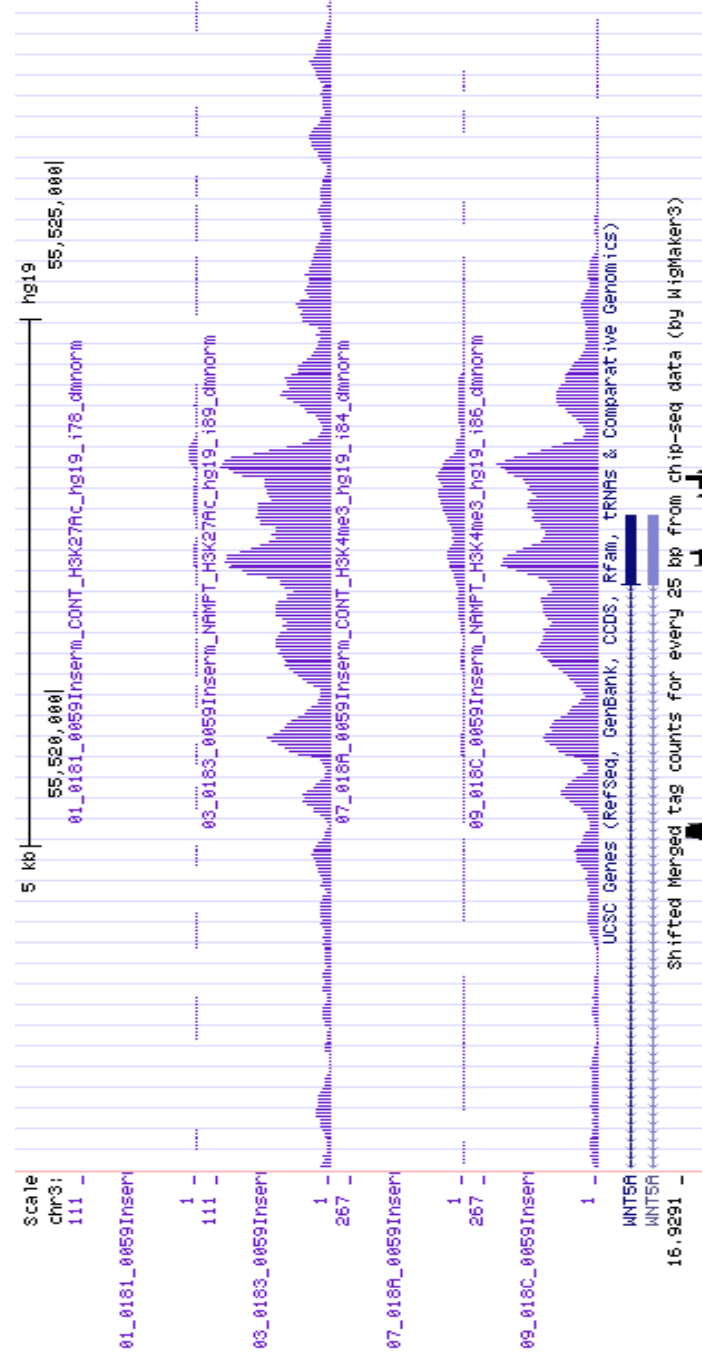

# Ohanna\_Supplemental Fig12

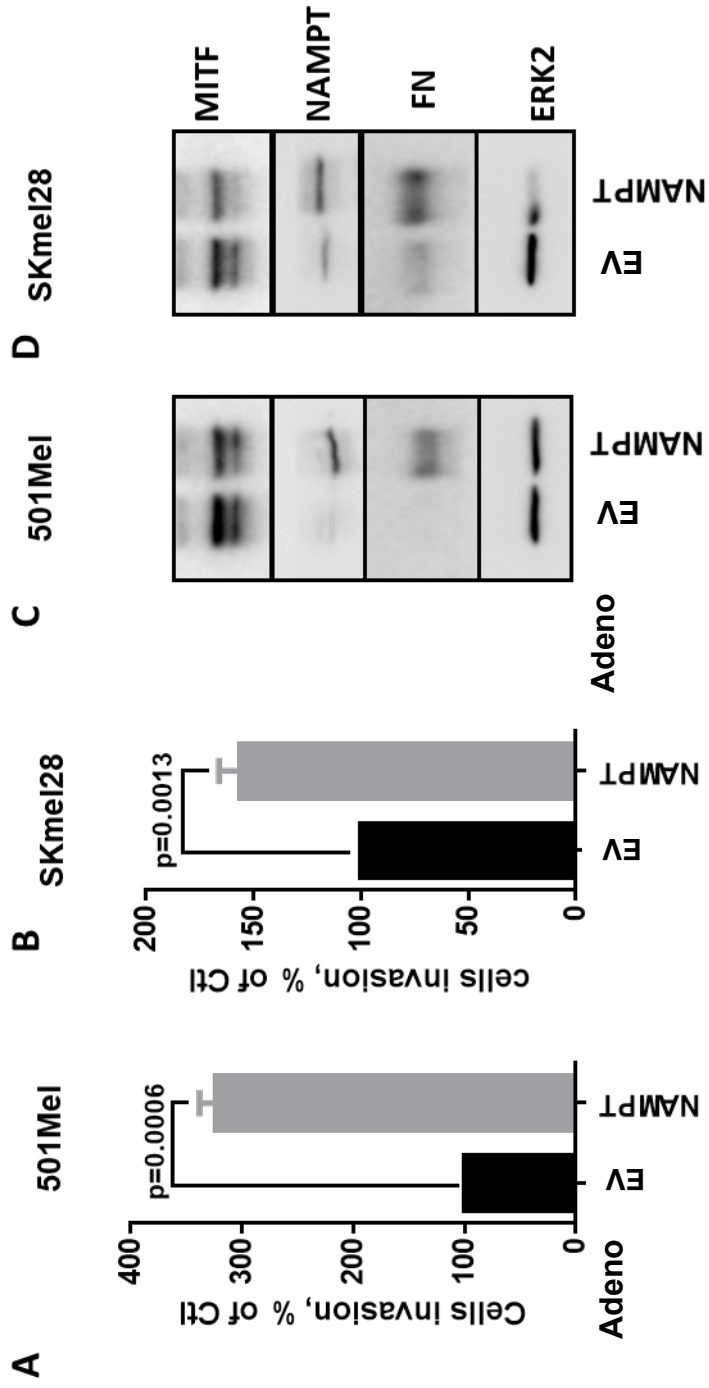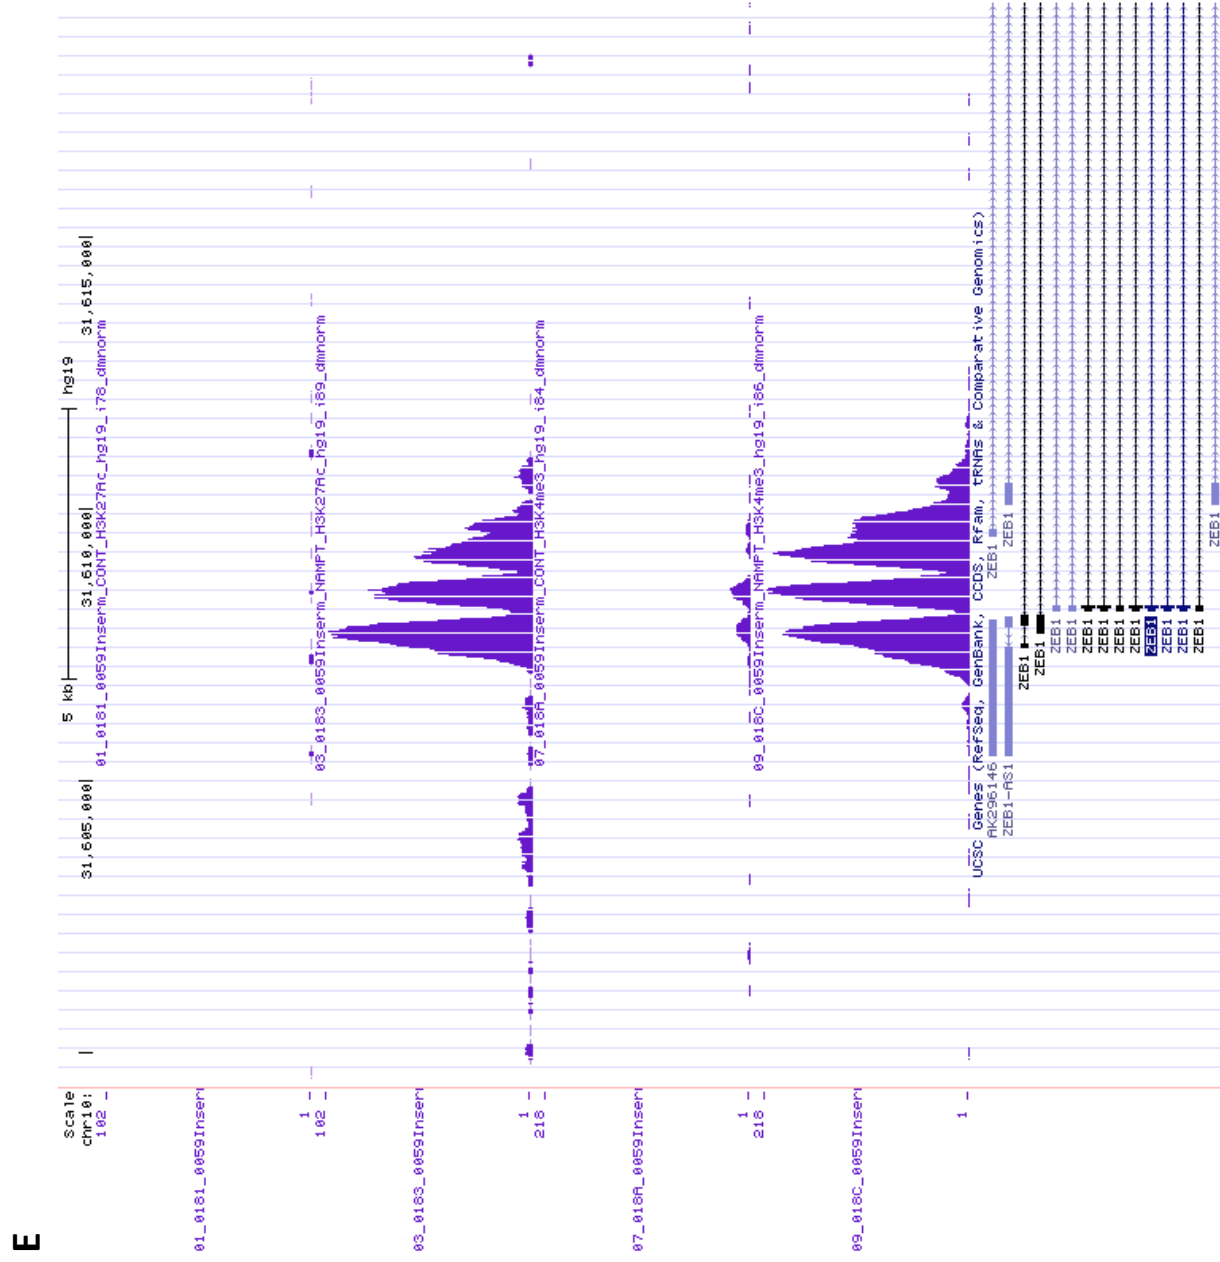

## Ohanna\_Supplemental Table S1

| Metabolite                                      | Log FC | FDR   |
|-------------------------------------------------|--------|-------|
| N6-succinyladenosine                            | -3.34  | 0.027 |
| N2-methylguanosine                              | -2.92  | 0.018 |
| leucylalanine                                   | -1.97  | 0.017 |
| N6-carbamoylthreonyladenosine                   | -1.96  | 0.017 |
| 1-1-enyl-palmitoyl-2-palmitoleoyl-GPC P-160/161 | -1.94  | 0.017 |
| leucylglycine                                   | -1.91  | 0.017 |
| 2'-deoxycytidine                                | -1.78  | 0.046 |
| retinol                                         | -1.74  | 0.028 |
| leucylglutamine                                 | -1.71  | 0.017 |
| 1-linoleoylglycerol 182                         | -1.68  | 0.044 |
| 1-1-enyl-palmitoyl-2-oleoyl-GPC P-160/181       | -1.67  | 0.017 |
| 5-methylcytidine                                | -1.67  | 0.017 |
| methionine sulfoxide                            | -1.66  | 0.017 |
| 2-linoleoylglycerol 182                         | -1.63  | 0.041 |
| 1-oleoylglycerol 181                            | -1.62  | 0.034 |
| 1-docosahexaenoylglycerol 226                   | -1.55  | 0.048 |
| 1-myristoylglycerol 140                         | -1.49  | 0.037 |
| valylleucine                                    | -1.41  | 0.017 |
| valylglutamine                                  | -1.40  | 0.023 |
| mannose                                         | -1.36  | 0.017 |
| palmitoleate 161n7                              | -1.35  | 0.026 |
| 2-oleoylglycerol 181                            | -1.31  | 0.038 |
| docosahexaenoate                                | -1.31  | 0.030 |
| alpha-lipoate                                   | -1.28  | 0.017 |
| tryptophylglycine                               | -1.28  | 0.032 |
| sulfate                                         | -1.26  | 0.017 |
| 1-oleoyl-GPS 181                                | -1.23  | 0.034 |
| eicosapentaenoate                               | -1.23  | 0.028 |
| N-acetylmethionine sulfoxide                    | -1.19  | 0.030 |
| C-glycosyltryptophan                            | -1.19  | 0.032 |
| N-palmitoyl-sphingadienine d182/160             | -1.14  | 0.017 |
| isoleucylglycine                                | -1.14  | 0.032 |
| myristoleate 141n5                              | -1.11  | 0.017 |
| 1-pentadecanoylglycerol 150                     | -1.11  | 0.026 |
| docosapentaenoate                               | -1.08  | 0.045 |
| erucate 221n9                                   | -1.08  | 0.038 |
| tyrosylglycine                                  | -1.07  | 0.044 |
| N-stearoyl-sphingadienine d182/180              | -1.06  | 0.034 |
| linolenate alpha or gamma                       | -1.05  | 0.017 |
| heme                                            | -1.05  | 0.037 |
| eicosenoate 201                                 | -1.03  | 0.037 |
| N-behenoyl-sphingadienine d182/220              | -1.00  | 0.017 |
| oleoyl ethanolamide                             | -1.00  | 0.038 |
| N-stearoyl-sphingosine d181/180                 | -0.98  | 0.030 |
| linoleate 182n6                                 | -0.97  | 0.042 |
| 1-palmitoylglycerol 160                         | -0.96  | 0.037 |
| N-myristoyl-sphingosine d181/140                | -0.95  | 0.017 |
| 2-palmitoleoyl-GPC 161                          | -0.94  | 0.017 |

|                                           |       |       |
|-------------------------------------------|-------|-------|
| 1-stearoyl-GPI 180                        | -0.94 | 0.025 |
| 1-1-enyl-oleoyl-GPE P-181                 | -0.91 | 0.044 |
| cytidine                                  | -0.89 | 0.030 |
| phenylalanylglycine                       | -0.86 | 0.032 |
| lactosyl-N-nervonoyl-sphingosine d181/241 | -0.86 | 0.032 |
| myristate 140                             | -0.86 | 0.023 |
| 1-1-enyl-oleoyl-2-linoleoyl               | -0.85 | 0.048 |
| palmitoyl ethanolamide                    | -0.84 | 0.017 |
| lactosyl-N-palmitoyl-sphingosine d181/160 | -0.84 | 0.017 |
| oleoyl-oleoyl-glycerol 181/181 1          | -0.82 | 0.017 |
| stearoyl-linoleoyl-glycerol 180/182 1     | -0.82 | 0.028 |
| nicotinamide riboside                     | -0.80 | 0.043 |
| carnitine                                 | 0.80  | 0.017 |
| 1.2-dipalmitoyl-GPC 160/160               | 0.82  | 0.017 |
| 1.2-dipalmitoyl-GPG 160/160               | 0.83  | 0.028 |
| coenzyme A                                | 0.85  | 0.017 |
| glutamate                                 | 0.91  | 0.027 |
| deoxycarnitine                            | 0.92  | 0.017 |
| adenosine 3'.5'-cyclic monophosphate      | 0.95  | 0.025 |
| 1-palmitoyl-2-stearoyl-GPC 160/180        | 0.95  | 0.017 |
| uridine 5'-monophosphate UMP              | 0.98  | 0.038 |
| ribitol                                   | 0.99  | 0.017 |
| nicotinamide adenine dinucleotide         | 1.02  | 0.026 |
| 3-4-hydroxyphenyllactate                  | 1.03  | 0.023 |
| arabitol/xylitol                          | 1.04  | 0.032 |
| N-formylmethionine                        | 1.07  | 0.017 |
| pantothenate                              | 1.09  | 0.035 |
| guanosine 5'-diphospho-fucose             | 1.11  | 0.017 |
| N-acetylserine                            | 1.12  | 0.028 |
| adenosine 5'-monophosphate                | 1.14  | 0.046 |
| N-acetylglutamate                         | 1.15  | 0.017 |
| phenyllactate                             | 1.21  | 0.032 |
| uridine 5'-diphosphate                    | 1.24  | 0.044 |
| 3-phosphoglycerate                        | 1.25  | 0.017 |
| UDP-glucuronate                           | 1.25  | 0.048 |
| allantoin                                 | 1.27  | 0.037 |
| beta-alanine                              | 1.30  | 0.032 |
| glutathione. reduced GSH                  | 1.31  | 0.028 |
| N-acetylcysteine                          | 1.32  | 0.023 |
| phosphoenolpyruvate                       | 1.32  | 0.017 |
| glucose 1-phosphate                       | 1.32  | 0.023 |
| gluconate                                 | 1.35  | 0.029 |
| N-acetylthreonine                         | 1.37  | 0.017 |
| succinylcarnitine                         | 1.38  | 0.036 |
| taurine                                   | 1.40  | 0.017 |
| indolelactate                             | 1.41  | 0.036 |
| N-acetyltaurine                           | 1.44  | 0.017 |
| N-acetylglutamine                         | 1.44  | 0.046 |
| cytidine triphosphate                     | 1.46  | 0.046 |
| N-acetylglucosaminyl asparagine           | 1.46  | 0.025 |
| alpha-ketoglutarate                       | 1.47  | 0.034 |
| cytidine diphosphate                      | 1.48  | 0.046 |

|                                 |      |       |
|---------------------------------|------|-------|
| 5-methyltetrahydrofolate 5MeTHF | 1.52 | 0.036 |
| N-acetylaspartate               | 1.53 | 0.030 |
| beta-guanidinopropanoate        | 1.57 | 0.044 |
| 3-hydroxybutyrylcarnitine 2     | 1.63 | 0.017 |
| uridine 5'-triphosphate UTP     | 1.65 | 0.019 |
| imidazole lactate               | 1.66 | 0.026 |
| ribonate                        | 1.69 | 0.035 |
| adenosine 5'-diphosphate        | 1.71 | 0.032 |
| lactate                         | 1.74 | 0.017 |
| carnosine                       | 1.76 | 0.046 |
| glycerate                       | 1.79 | 0.038 |
| N-acetylglucosamine 6-phosphate | 2.04 | 0.027 |
| hypotaurine                     | 2.07 | 0.017 |
| cysteinylglycine                | 2.31 | 0.026 |
| gamma-glutamylcysteine          | 2.33 | 0.047 |
| inosine 5'-monophosphate        | 2.35 | 0.035 |
| UDP-glucose                     | 2.57 | 0.024 |
| acetylphosphate                 | 2.68 | 0.037 |
| UDP-galactose                   | 2.93 | 0.023 |

## Ohanna\_Supplemental Table S2

| Metabolite function      | Total Compounds | Hits | Enrichment | Raw p | FDR   |
|--------------------------|-----------------|------|------------|-------|-------|
| VITAMIN B6 METABOLISM    | 10              | 5    | 2.851      | 0.022 | 0.046 |
| ARGININE AND PROLINE ME  | 26              | 8    | 2.210      | 0.018 | 0.040 |
| INSULIN SIGNALLING       | 19              | 5    | 3.279      | 0.016 | 0.037 |
| GLYCEROLIPID METABOLISM  | 13              | 4    | 3.263      | 0.014 | 0.034 |
| BETA-ALANINE METABOLISM  | 13              | 5    | 3.265      | 0.011 | 0.029 |
| BETAINE METABOLISM       | 10              | 5    | 3.438      | 0.011 | 0.029 |
| PENTOSE PHOSPHATE PATH'  | 18              | 5    | 4.201      | 0.009 | 0.026 |
| NICOTINATE AND NICOTINAI | 13              | 4    | 4.810      | 0.008 | 0.025 |
| MITOCHONDRIAL ELECTRON   | 15              | 5    | 3.945      | 0.008 | 0.025 |
| ALANINE METABOLISM       | 6               | 3    | 5.395      | 0.005 | 0.019 |
| PURINE METABOLISM        | 45              | 19   | 3.041      | 0.004 | 0.015 |
| ALPHA LINOLENIC ACID AND | 9               | 6    | 4.192      | 0.002 | 0.010 |
| PYRUVATE METABOLISM      | 20              | 4    | 4.886      | 0.002 | 0.009 |
| GLUCOSE-ALANINE CYCLE    | 12              | 5    | 4.925      | 0.002 | 0.009 |
| CITRIC ACID CYCLE        | 23              | 10   | 4.780      | 0.000 | 0.009 |
| NUCLEOTIDE SUGARS META   | 9               | 4    | 4.879      | 0.000 | 0.009 |
| UREA CYCLE               | 20              | 11   | 4.272      | 0.001 | 0.009 |
| GLYCINE SERINE AND THREC | 26              | 10   | 4.145      | 0.001 | 0.009 |
| GLUCONEOGENESIS          | 27              | 11   | 4.969      | 0.001 | 0.009 |
| PYRIMIDINE METABOLISM    | 36              | 18   | 3.459      | 0.001 | 0.009 |
| RNA TRANSCRIPTION        | 9               | 6    | 4.697      | 0.001 | 0.009 |
| GLYCOLYSIS               | 21              | 9    | 4.993      | 0.001 | 0.009 |
| ASPARTATE METABOLISM     | 12              | 6    | 3.751      | 0.001 | 0.009 |
| AMMONIA RECYCLING        | 18              | 10   | 4.181      | 0.001 | 0.009 |
| MALATE-ASPARTATE SHUTTI  | 8               | 4    | 4.807      | 0.000 | 0.008 |
| BILE ACID BIOSYNTHESIS   | 49              | 3    | 6.610      | 0.000 | 0.001 |
| TAURINE AND HYPOTAURINI  | 7               | 3    | 8.453      | 0.000 | 0.001 |

### Ohanna\_Supplemental Table S3

|                                   | p-Value  | z-score |
|-----------------------------------|----------|---------|
| Cell movement                     | 1.66E-23 | 4.065   |
| Migration of cells                | 5.99E-23 | 3.435   |
| Development of vasculature        | 1.40E-17 | 2.527   |
| Angiogenesis                      | 4.96E-17 | 2.527   |
| Morbidity or mortality            | 1.04E-16 | -5.451  |
| Organismal death                  | 1.44E-16 | -5.395  |
| Cell movement of tumor cell lines | 1.60E-16 | 4.135   |
| Invasion of tumor cell lines      | 2.81E-16 | 3.323   |
| Invasion of cells                 | 2.91E-16 | 3.556   |
| Migration of tumor cell lines     | 6.73E-15 | 3.768   |
